# Supplementary material
Source: Springer Nature journal article supplement (https://www.springermedizin.de/resource/supplementary/13048_2012_97_MOESM4_ESM.pdf/9664888)

**A.**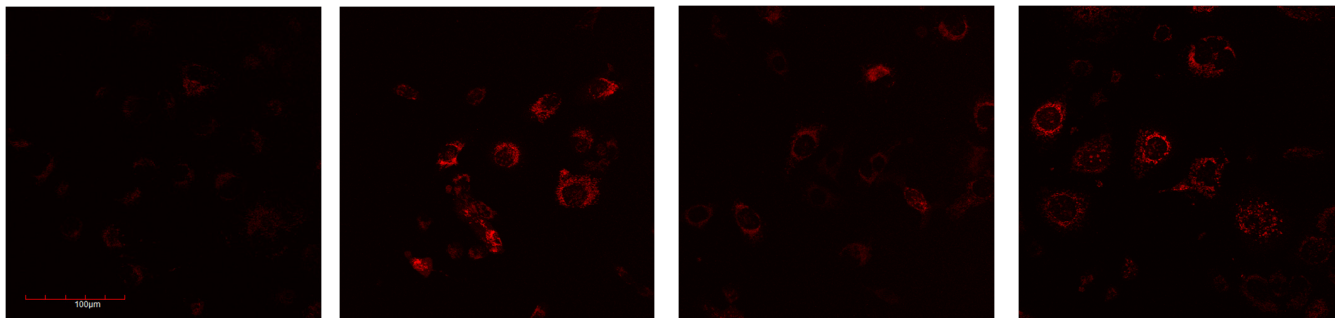

Control

Metformin 5mM

PEITC 1uM

Met + PEITC

**B.**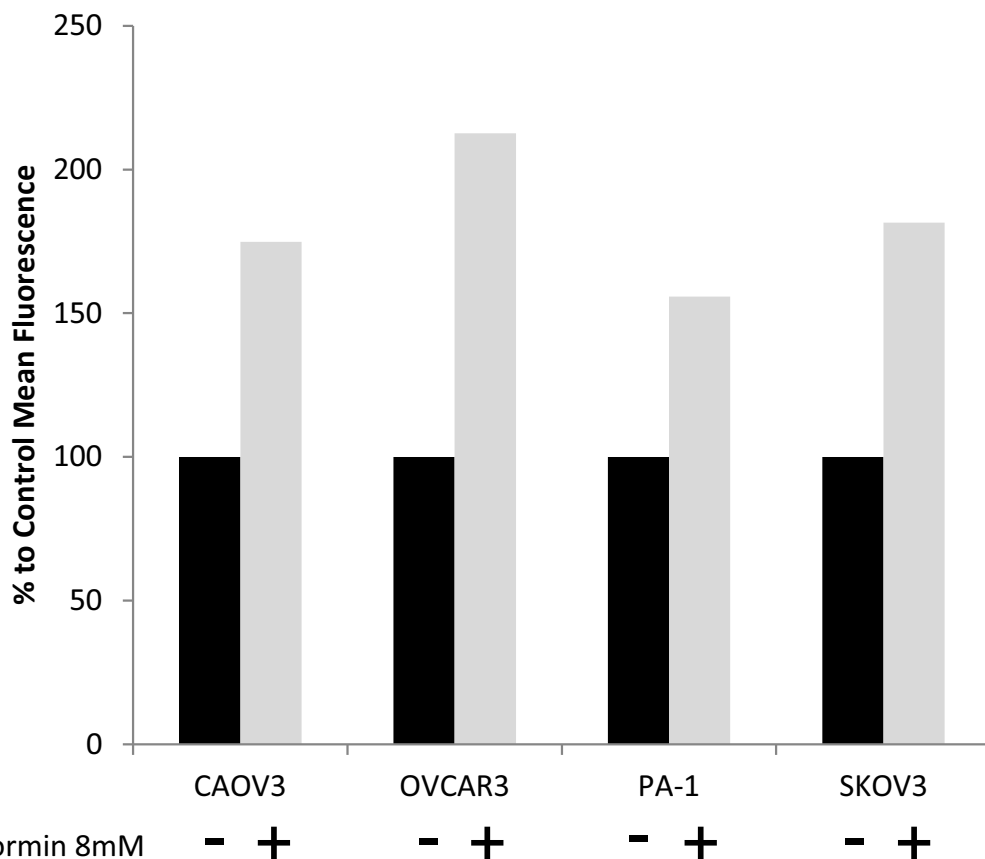

Supplement: MOESM4 [file 9664888]
